# Supplementary material for: Formation of CaCO3 fibres directed by polypeptide vesicles
Source: Royal Society of Chemistry journal article supplement (doi:10.1039/c6tb00759g), 2016-01-01
Supplement: c6tb00759g1.pdf [file c6tb00759g1.pdf]

1 **Supporting Information**

2

3 **Formation of CaCO<sub>3</sub> Fibres Directed by Polypeptide Vesicles**

4 Yingqing Lu, Chunhua Cai,\* Jiaping Lin\* and Qixin Zhuang

5 *Shanghai Key Laboratory of Advanced Polymeric Materials, State Key Laboratory of Bioreactor*  
6 *Engineering, Key Laboratory for Ultrafine Materials of Ministry of Education, School of Materials*  
7 *Science and Engineering, East China University of Science and Technology, Shanghai 200237,*  
8 *China*

9 \* E-mail: [jlin@ecust.edu.cn](mailto:jlin@ecust.edu.cn) (J. Lin); [caichunhua@ecust.edu.cn](mailto:caichunhua@ecust.edu.cn) (C. Cai)

## 1. Characterization of the PBLG-*b*-PPO-*b*-PBLG and PLGA-*b*-PPO-*b*-PLGA copolymers

The structure of PBLG-*b*-PPO-*b*-PBLG and PLGA-*b*-PPO-*b*-PLGA copolymers was characterized by <sup>1</sup>H NMR and GPC. <sup>1</sup>H NMR spectra were recorded using Avance 550, Bruker. Figure S1 shows the <sup>1</sup>H NMR spectra of PBLG-*b*-PPO-*b*-PBLG and PLGA-*b*-PPO-*b*-PLGA block copolymers using CDCl<sub>3</sub> with 15 vol% TFA-d as solvent. Since the degree of polymerization (DP) of the PPO block is known (68), the total molecular weights of the triblock copolymers can be calculated by the peak intensities of the methylene proton signal (5.1 ppm) of polypeptide and the methylene proton signal (3.6 ppm) of PPO in the <sup>1</sup>H NMR spectrum (Figure S1a). Compared with the <sup>1</sup>H NMR spectrum of PBLG-*b*-PPO-*b*-PBLG, the disappearance of the methylene proton peak (5.1 ppm) in the spectrum of PLGA-*b*-PPO-*b*-PLGA indicates the complete deprotection of the benzyl groups after the hydrolysis reaction (Figure S1b).<sup>S1</sup>

The molecular weight distributions of PBLG-*b*-PPO-*b*-PBLG triblock copolymers with various PBLG block lengths were determined by GPC (Polymer Lab, PL-GPC50) using PBLG homopolymers with narrow molecular weight distribution as standards, performed in DMF/LiBr solution. All the samples show a monomodal GPC curve and narrow molecular weight distribution (Figure S2).

18

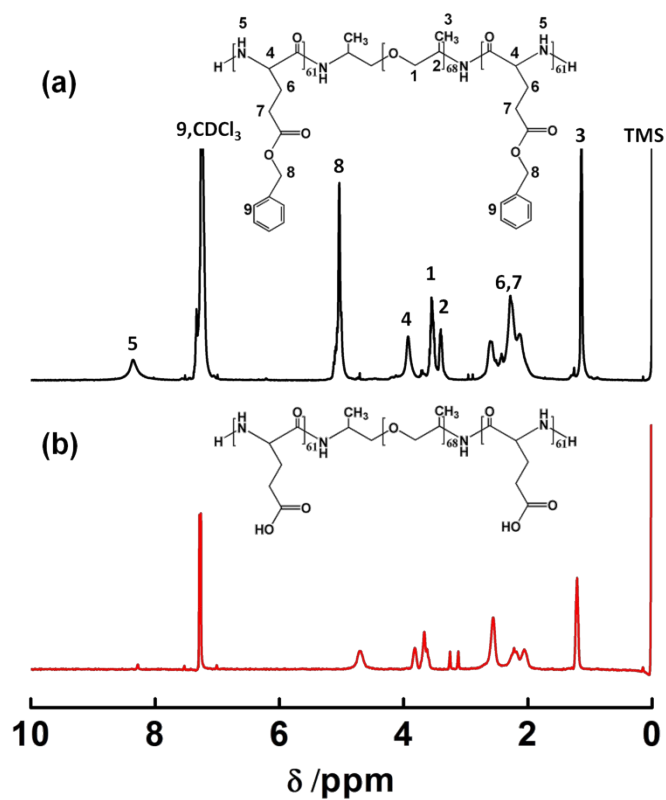

1  
 2 **Figure S1** <sup>1</sup>H NMR spectra of (a) PBLG<sub>61</sub>-*b*-PPO<sub>69</sub>-*b*-PBLG<sub>61</sub> and (b) PLGA<sub>61</sub>-*b*-PPO<sub>69</sub>-*b*-PLGA<sub>61</sub> in CDCl<sub>3</sub> and  
 3 TFA-d mixture solvent.

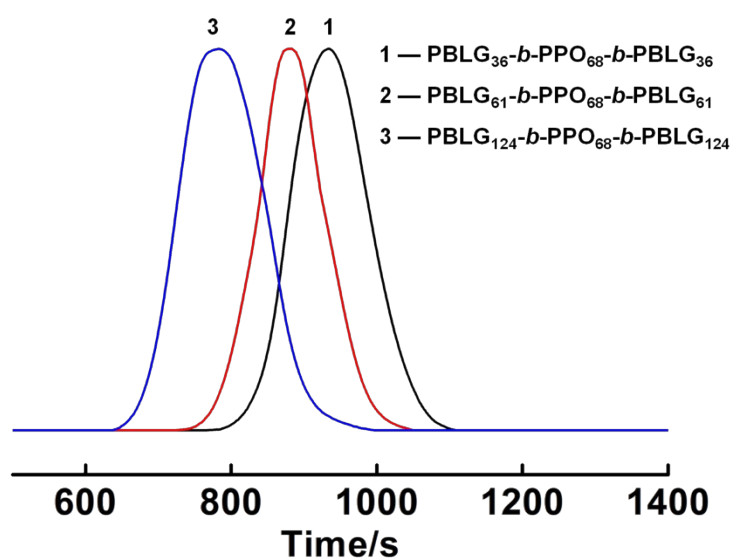

4  
 5 **Figure S2** GPC traces of PBLG-*b*-PPO-*b*-PBLG triblock copolymers using DMF/LiBr as eluent.

## 2. Characterization of vesicles formed in the presence of Ca<sup>2+</sup>

GPG aggregates with 15 mM Ca<sup>2+</sup> were examined by laser light scattering and electrophoresis testing, as shown in Table S1. The Ca<sup>2+</sup> was added in solution at 5 °C. It can be seen that the  $\langle R_g \rangle / \langle R_h \rangle$  values of the solutions are around 1.0, indicating the vesicular structure of aggregates. The vesicle size is dependent on temperature and copolymer concentration, which is similar to the case of vesicles without Ca<sup>2+</sup>. The addition of Ca<sup>2+</sup> can slightly increase the  $\langle R_h \rangle$  values and distributions, which is caused by the binding of Ca<sup>2+</sup> in vesicle corona. The electrostatic screening effect of Ca<sup>2+</sup> can decrease the repulsive interaction between PLGA chains in vesicles corona, resulting in the shrinking of the volume occupied by the hydrophilic blocks. Therefore, the interfacial curvature between the PPO and PLGA blocks decreases and larger vesicles are formed. The zeta potentials of GPG-Ca<sup>2+</sup> vesicles are higher than the vesicles without Ca<sup>2+</sup>, which indicates the binding effect of Ca<sup>2+</sup> and COO<sup>-</sup> groups.

**Table S1** Characteristics of PLGA-*b*-PPO-*b*-PLGA copolymer vesicles

| <b>copolymer</b> | <b>Conc. / gL<sup>-1</sup></b> | <b>Temp. / °C</b> | <b><math>\langle R_h \rangle</math> / nm</b> | <b>PDI<sup>a</sup></b> | <b><math>\langle R_g \rangle</math> / nm</b> | <b><math>\langle R_g \rangle / \langle R_h \rangle</math></b> | <b><math>\xi</math> / mV</b> |
|------------------|--------------------------------|-------------------|----------------------------------------------|------------------------|----------------------------------------------|---------------------------------------------------------------|------------------------------|
| GPG61            | 1.0                            | 50                | 152.1                                        | 0.12                   | 142.0                                        | 0.94                                                          | -10.1                        |
| GPG61            | 1.0                            | 35                | 196.0                                        | 0.15                   | 181.6                                        | 0.93                                                          | -16.0                        |
| GPG61            | 1.0                            | 20                | 244.6                                        | 0.16                   | 260.9                                        | 1.07                                                          | -20.1                        |
| GPG61            | 0.5                            | 50                | 106.2                                        | 0.10                   | 109.0                                        | 1.02                                                          | -8.5                         |
| GPG61            | 1.5                            | 50                | 200.3                                        | 0.17                   | 209.9                                        | 1.05                                                          | -10.8                        |
| GPG36            | 1.0                            | 50                | 141.4                                        | 0.13                   | 140.5                                        | 0.99                                                          | -12.3                        |
| GPG124           | 1.0                            | 50                | 170.4                                        | 0.14                   | 171.4                                        | 1.01                                                          | -8.9                         |

<sup>a</sup> Polydispersity index (PDI) of the vesicles was determined at the scattering angle of 90°.

### 1 **3. CaCO<sub>3</sub> crystallization in the presence of PLGA or PPO** 2 **homopolymers under various temperatures**

3 The influence of PLGA and PPO homopolymers on CaCO<sub>3</sub> mineralization was studied as  
4 control experiments. The degrees of polymerization of PLGA and PPO homopolymers are 92 and  
5 68, respectively. As shown in Figure S3a-d, smooth spheres were obtained in the presence of PLGA  
6 homopolymer. Figure S3e shows the FTIR spectra of the obtained spherical crystals. The absorption  
7 bands at 1089, 877, and 745 cm<sup>-1</sup> are the characteristic bands of vaterite, indicating the crystals are  
8 all vaterite at various temperatures. Smooth spheres have been produced in previous literature under  
9 the mediation of double hydrophilic block copolymers or acid polypeptides.<sup>S2-S5</sup>

10 Figure S4 shows SEM images and FTIR spectra of CaCO<sub>3</sub> crystals formed under the mediation  
11 of PPO homopolymer. The crystals show rhombohedra morphology at various temperatures (Figure  
12 S4a-d). In FTIR spectra, the absorption bands at 1089, 877, and 710 cm<sup>-1</sup> are the characteristic bands  
13 of calcite (Figure S4e). The absorption band at 1110 cm<sup>-1</sup> corresponds to PPO homopolymer, which  
14 was probably mixed in crystals because of the low solubility at temperatures above 20 °C.  
15 Rhombohedra particles are usually formed in the absence of additives.<sup>S6,S7</sup> The above results indicate  
16 that the influences of PLGA and PPO homopolymer on CaCO<sub>3</sub> are independent on temperature.

17

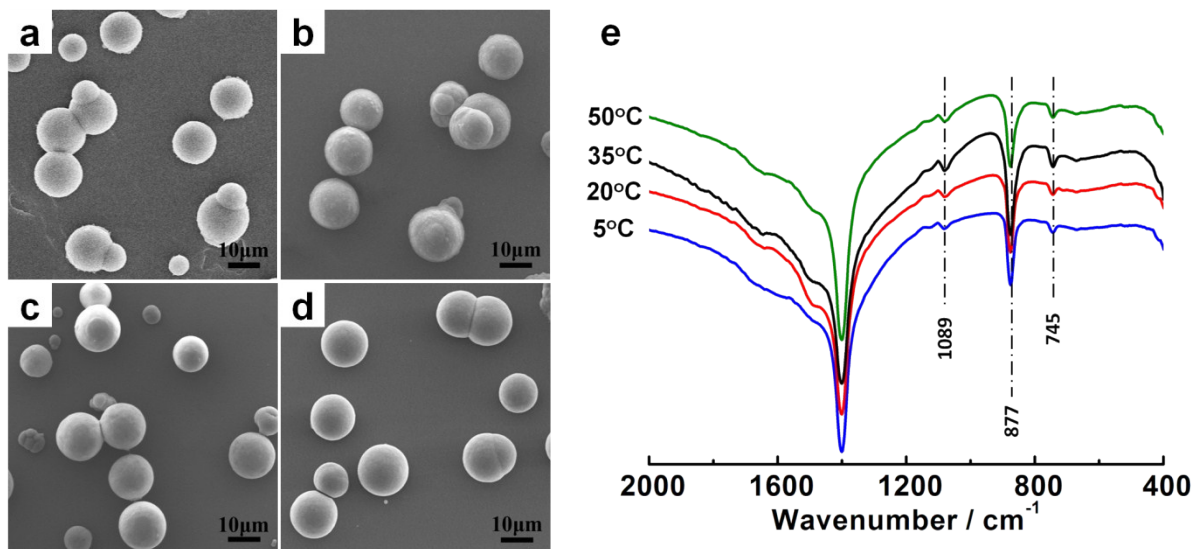

1

2 **Figure S3** SEM images and FTIR spectra of CaCO<sub>3</sub> crystals formed in the presence of PLGA<sub>92</sub> at various  
 3 temperatures. (a) 5 °C; (b) 20 °C; (c) 35 °C; (d) 50 °C. (e) FTIR patterns. [PLGA<sub>92</sub>] = 1.0 gL<sup>-1</sup>, [Ca<sup>2+</sup>] = 15 mM.

4

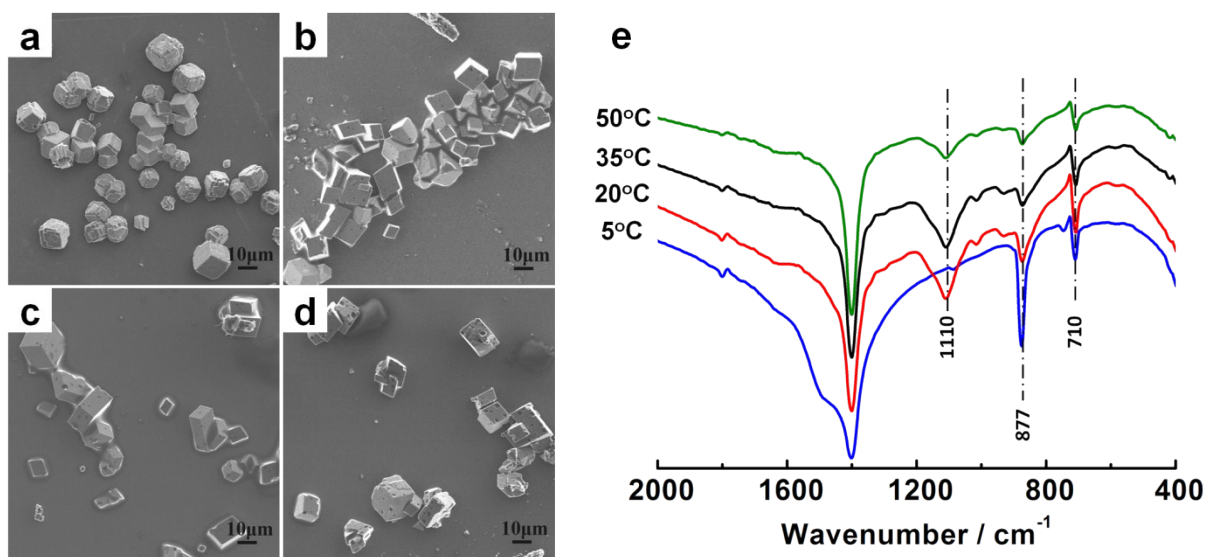

5

6 **Figure S4** SEM images and FTIR spectra of CaCO<sub>3</sub> crystals formed in the presence of PPO<sub>68</sub> at various  
 7 temperatures. (a) 5 °C; (b) 20 °C; (c) 35 °C; (d) 50 °C. (e) FTIR patterns. [PPO<sub>68</sub>] = 1.0 gL<sup>-1</sup>, [Ca<sup>2+</sup>] = 15 mM.

## 1 4. Morphology of reaction intermediates at 20 and 50 °C

2 The morphologies of amorphous phase at 20 and 50°C are compared by SEM. At 50 °C, the  
3 amorphous phase exhibits colloidal-like morphology. The colloidal particles underwent coalescence  
4 due to an external forced flow during sample preparation (Figure S5a). At 25 °C, the amorphous  
5 particles are solid-like, which show stable spherical shape and cannot fuse with each other (Figure  
6 S5c). These two pictures demonstrate the distinct morphology of amorphous phase at different  
7 temperatures. Figure S5b shows short fibres formed at 50 °C for 1hr reaction. Most of the fibres  
8 contain colloidal-like “bobbles” on the tips. Figure S5d displays crystal patches at 20 °C for 1 hr  
9 reaction. The crystallized patches are surrounded by precipitate-free circular halos (as indicated by  
10 the arrow). This observation shows that the crystals are formed after ACC via a  
11 dissolution/precipitation mechanism.

12

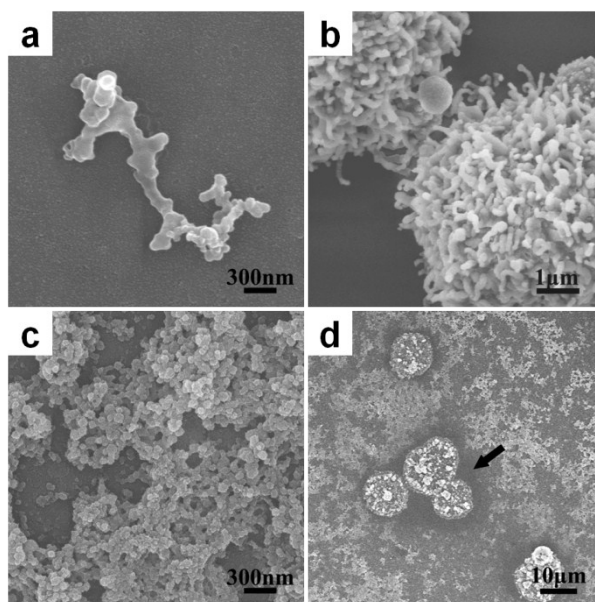

13

14 **Figure S5** SEM images of intermediates at 20 and 50 °C. (a) Colloidal amorphous precursors formed at 50 °C for  
15 30 min reaction. (b) Crystals formed at 50 °C for 1hr reaction. (c) Solid amorphous particles formed at 20 °C for  
16 30 min reaction. (d) The crystal patches of CaCO<sub>3</sub> generated at 20 °C for 1 hr reaction.

## 1 **5. Investigation of crystal phase transition process at different time** 2 **intervals at 50, 35, and 20 °C by FT-IR characterization**

3 The structure of reaction intermediates were characterized by FT-IR (Figure S6). The  
4 absorption bands at 1654 and 1109  $\text{cm}^{-1}$  are attributed to the C=O and C-N stretching vibration bands  
5 of GPG copolymer, respectively. These two bands become less evident with time, indicating the  
6 decrease of polymer fraction during crystallization. The broad absorption band at 865  $\text{cm}^{-1}$  is the  
7 characteristic absorption band of amorphous calcium carbonate. The 865  $\text{cm}^{-1}$  absorption band  
8 vanishes and the  $\nu_4$  absorption bands of vaterite at 745  $\text{cm}^{-1}$  appears at 1hr. After 12 hr reaction, the  
9 pattern is unchanged at 50 °C. However, at 35 and 20 °C, the absorption band of calcite at 712  $\text{cm}^{-1}$   
10 rises and the band of vaterite becomes weak. This result indicates that the phase transformation  
11 process is different at various temperatures. At higher temperature, the calcium carbonate transforms  
12 form amorphous to vaterite, and the vaterite is stabilized as the final crystal phase. At lower  
13 temperature, the amorphous phase first transforms to vaterite, and then the vaterite crystals continue  
14 to transform to calcite.

15 The polymorph of crystals formed in the absence of additives was examine, as well (Figure  
16 S7). Calcite crystals are formed at all temperatures, indicating that temperature cannot change the  
17 final polymorph of  $\text{CaCO}_3$  under this experimental condition. Therefore, the different transformation  
18 processes of polymorph in the presence of the vesicles are attributed to the copolymer rather than  
19 temperature.



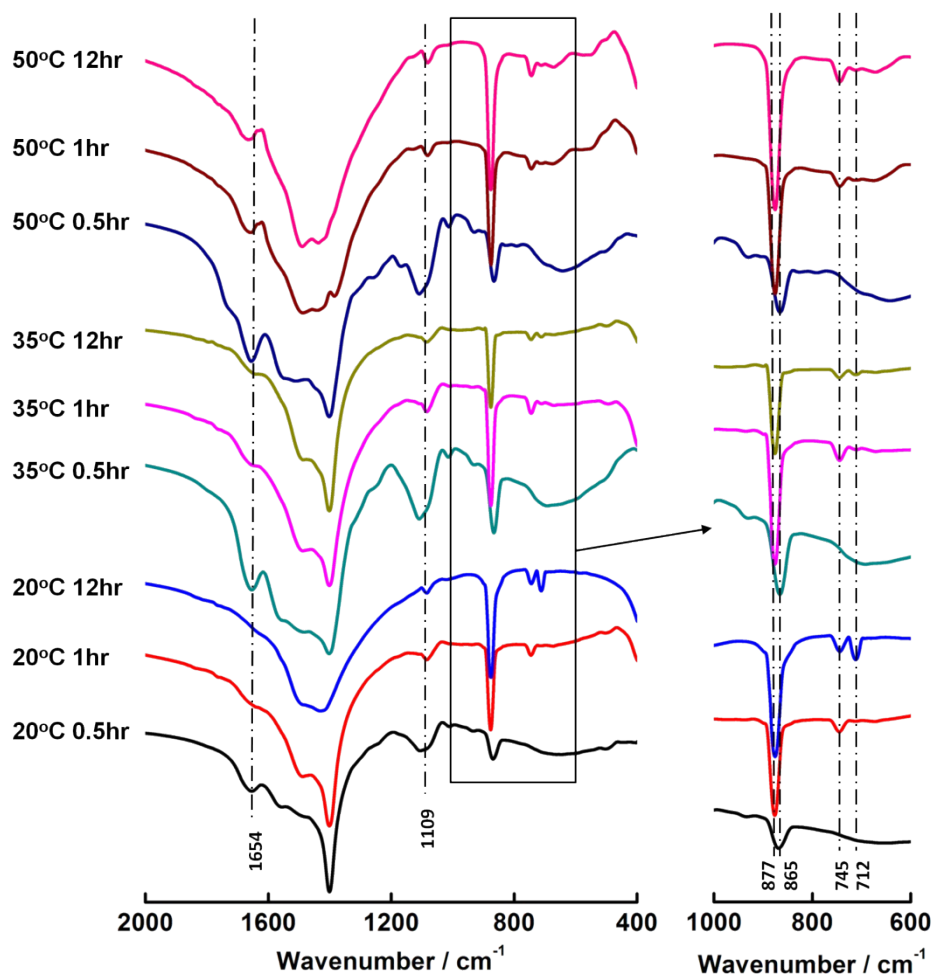

1

2 **Figure S6** FT-IR spectra of reaction intermediates collected at different reaction intervals at 50, 35, and 20 °C.

3  $[GPG60] = 1 \text{ gL}^{-1}$ ,  $[Ca^{2+}] = 15 \text{ mM}$ .

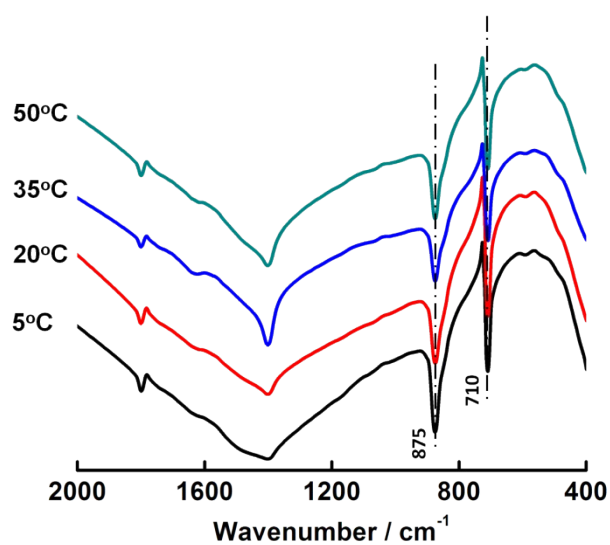

4

5 **Figure S7** FT-IR spectra of crystals formed at various temperatures in the absence of additives.

## 1 References

- 2 S1. C. Cai, L. Zhang, J. Lin and L. Wang, *J. Phys. Chem. B*, 2008, **112**, 12666-12673.
- 3 S2. X. H. Guo, S. H. Yu and G. B. Cai, *Angew. Chem. Int. Ed.*, 2006, **45**, 3977-3981.
- 4 S3. S. H. Yu, H. Cölfen and M. Antonietti, *J. Phys. Chem. B*, 2003, **107**, 7396-7405.
- 5 S4. B. Njegić-Džakula, G. Falini, L. Brečević, Ž. Skoko and D. Kralj, *J. Colloid Interface Sci.*, 2010, **343**, 553-563.
- 6 S5. R. Kniep and S. Busch, *Angew. Chem. Int. Ed.*, 1996, **35**, 2624-2626.
- 7 S6. H. Deng, X. M. Wang, C. Du, X. C. Shen and F. Z. Cui, *Crystengcomm*, 2012, **14**, 6647-6653.
- 8 S7. Z. Chen, M. Xin, M. Li, J. Xu, X. Li and X. Chen, *J. Cryst. Growth*, 2014, **404**, 107-115.

9
